An interesting and useful feature of the study is the seven case histories which conclude it. They include studies of the Nicaro nickel development, the Cuban Telephone Company, the Habana Hilton Hotel, and four other enterprises of recent (i.e. pre-1959) development. Spanish words are misspelled in a few instances and accents are uniformly omitted.

RUSSELL H. FITZGIBBON

University of California,  
Santa Barbara

*The Family and Population Control. A Puerto Rican Experiment in Social Change.* By REUBEN HILL, J. MAYONE STYCOS, and KURT W. BACK. New Haven, 1965. College and University Press. Appendices. Index. Pp. 481. Paper. \$3.45.

The appearance of this volume in a softbound edition will certainly be welcome in light of the growing concern over demographic problems in Latin America and elsewhere. The authors and their many collaborators discuss Puerto Rico's demographic characteristics, set forth their research project and discuss the methods used, describe the results, and then design and carry out an experiment based on the research findings promoting family planning. They report the outcome of the experiment and make suggestions for the establishment of official programs and policy towards population control.

This is an important work for several reasons. It furnishes an example of sociological methodology which includes an actual testing of hypotheses under field conditions, producing a variety of conclusions and data which will be useful for comparative work elsewhere. It also explores the validity of certain "time-honored" assumptions concerning cultural values and population control in Latin America, such as the importance of *machismo* and the influence of the Roman Catholic Church. It is this latter area that historians and others not concerned with the major focus of this work will find most interesting.

*The Andean Republics. Bolivia, Chile, Ecuador, Peru.* By WILLIAM WEBER JOHNSON and THE EDITORS OF *LIFE*. New York, 1965. Time, Inc. *LIFE* World Library. Illustrations. Appendix. Index. Pp. 160. \$2.95.

This volume, the most recent of *LIFE World Library*, is an excellent work in every respect. The end-paper maps are readable and enlightening. The black and white photographs are attractive, and some of the many color pictures are surpassing in their beauty.

A work of this type cannot, of course, go into great detail; it must necessarily summarize. A careful reading has failed to disclose an unjustified generalization or a mistake in facts. Only one question of any importance arises: Is not Colombia also an "Andean Republic?" Since it is omitted, the title might more properly be *Four Andean Republics*.

The content includes brief sketches of the Indian background and the region's geography, the conquest by Spain, the colonial period, the revolution, and brief histories of the four republics. The most rewarding sections are the last two, "A Cultural Quest" and "Agitation from the Center." The latter describes current conditions and suggests possible future developments.

For one who knows little of Spanish-Indian Latin America and wishes to learn something of it in a general sense, the reviewer can suggest no book superior to this. *LIFE*, the author, and those who assisted him are to be congratulated.

WATT STEWART

Albuquerque, New Mexico

*Un testigo en la alborada de Chile, 1826-1829.* By EDUARDO POEPPIG. Translated by CARLOS KELLER. Santiago, 1960. Editorial Zig Zag. Illustrations. Notes. Bibliography. Index. Pp. 507.

This is a profusely illustrated and excellently edited translation of the first volume or Chilean portion of *Reise in Chile, Peru und auf dem Amazonenstromen während der Jahre, 1827-1832*
